# Supplementary material
Source: PubMed Central journal article supplement (PMC11589953)
Supplement: NIHPP2406.13292v2-supplement-1.pdf [file NIHPP2406.13292v2-supplement-1.pdf]

# Supplementary Materials: An interpretable generative multimodal neuroimaging-genomics framework for decoding Alzheimer’s disease

Giorgio Dolci<sup>a,b</sup>, Federica Cruciani<sup>a\*</sup>, Md Abdur Rahaman<sup>b</sup>, Anees Abrol<sup>b</sup>, Jiayu Chen<sup>b</sup>,  
Zening Fu<sup>b</sup>, Iliara Boscolo Galazzo<sup>a</sup>, Gloria Menegaz<sup>a,\*\*</sup>, Vince D. Calhoun<sup>b,\*\*</sup>,  
for the Alzheimer’s Disease Neuroimaging Initiative<sup>1</sup>

<sup>a</sup>*Department of Engineering and Innovation Medicine, University of Verona, Verona, Italy*

<sup>b</sup>*Tri-Institutional Center for Translational Research in Neuroimaging and Data Science (TReNDS), Georgia State University, Georgia Institute of Technology, Emory University, Atlanta, GA, USA*

## Preprocessing quality control

A thorough quality control (QC) was performed to retain scans with good normalization to the standard MNI space, which involved discarding sMRI and fMRI images that exhibited low correlation with individual and/or group-level masks. In this spatial correlation process, we first calculated subject-level masks using the subject MRI scans (only the first volume in case of fMRI) by setting the brain voxels to 1 if the values of these voxels were greater than 80% of the average value across whole-brain voxels, and 0 otherwise. Next, after computing the subject-level masks, we calculated a group mask by setting the voxels to 1 for which at least 70% of the subject-level masks had a value of 1. Lastly, we examined the spatial correlations of the subject and group level masks and retained subjects that showed a correlation value greater than 0.85. Additionally, for fMRI, scans with larger head motion parameters ( $> 3^\circ$  rotations and  $> 3$  mm translations) were discarded.

arXiv:2406.13292v2 [q-bio.QM] 14 Nov 2024

---

\*Corresponding author: Department of Engineering and Innovation Medicine, University of Verona, Verona, Italy.  
*e-mail:* federica.cruciani@univr.it

\*\*Equally contributed as last authors to this work.

<sup>1</sup>Data used in preparation of this article were obtained from the Alzheimer’s Disease Neuroimaging Initiative (ADNI) database (adni.loni.usc.edu). As such, the investigators within the ADNI contributed to the design and implementation of ADNI and/or provided data but did not participate in analysis or writing of this report. A complete listing of ADNI investigators can be found at: [http://adni.loni.usc.edu/wp-content/uploads/how\\_to\\_apply/ADNI\\_Acknowledgement\\_List.pdf](http://adni.loni.usc.edu/wp-content/uploads/how_to_apply/ADNI_Acknowledgement_List.pdf)

## Results

Table 1: In this Table are reported the correspondences acronym - full name of the sMRI brain regions under analysis.

| Acronym | Full name                                    | Acronym | Full name                 |
|---------|----------------------------------------------|---------|---------------------------|
| Ins     | Insular Cortex                               | OfG     | Occipital Fusiform Gyrus  |
| TP      | Temporal Pole                                | COpC    | Central Opercular Cortex  |
| ScC     | Subcallosal Cortex                           | POpC    | Parietal Operculum Cortex |
| CGp     | Cingulate Gyrus, posterior division          | Thl     | Thalamus                  |
| PcC     | Precuneus Cortex                             | Cau     | Caudate                   |
| FOC     | Frontal Orbital Cortex                       | Put     | Putamen                   |
| PhGa    | Parahippocampal Gyrus, anterior division     | Pall    | Pallidum                  |
| PaGp    | Parahippocampal Gyrus, posterior division    | Hipp    | Hippocampus               |
| LG      | Lingual Gyrus                                | Amy     | Amygdala                  |
| TFCp    | Temporal Fusiform Cortex, posterior division | Acc     | Accumbens                 |
| TOF     | Temporal Occipital Fusiform Cortex           |         |                           |

Table 2: In this Table are reported the 53 ICs present in the sFNC matrices with corresponding brain region name, network at which it belongs to, and spatial location in the brain along X, Y, and Z axis. SC=Sub-cortical; AU=Auditory; SM=sensorimotor; VI=visual; CC=cognitive-control; DM=default-mode; and CB=cerebellar. In *italic* are highlighted the brain regions present in the fMRI connectograms of Results section.

| IC ID | Brain region                        | Network | X     | Y     | Z     | IC ID | Brain region                         | Network | X     | Y     | Z     |
|-------|-------------------------------------|---------|-------|-------|-------|-------|--------------------------------------|---------|-------|-------|-------|
| 1     | Caudate                             | SC      | 6.5   | 10.5  | 5.5   | 26    | Inferior parietal lobule             | CC      | 45.5  | -61.5 | 43.5  |
| 2     | Subthalamus/hypothalamys            | SC      | -2.5  | -13.5 | -1.5  | 27    | Insula                               | CC      | -30.5 | 22.5  | -3.5  |
| 3     | Putamen                             | SC      | -26.5 | 1.5   | -0.5  | 28    | <i>Superior medial frontal gyrus</i> | CC      | -0.5  | 50.5  | 29.5  |
| 4     | Caudate                             | SC      | 21.5  | 10.5  | -3.5  | 29    | Inferior frontal gyrus               | CC      | -48.5 | 34.5  | -0.5  |
| 5     | Thalamus                            | SC      | -12.5 | -18.5 | 11.5  | 30    | Right inferior frontal gyrus         | CC      | 53.5  | 22.5  | 13.5  |
| 6     | Superior temporal gyrus             | AU      | 62.5  | -22.5 | 7.5   | 31    | Middle frontal gyrus                 | CC      | -41.5 | 19.5  | 26.5  |
| 7     | Middle temporal gyrus               | AU      | -42.5 | -6.5  | 10.5  | 32    | Inferior parietal lobule             | CC      | -53.5 | -49.5 | 43.5  |
| 8     | <i>Postcentral gyrus</i>            | SM      | 56.5  | -4.5  | 28.5  | 33    | <i>Left inferior parietal lobule</i> | CC      | 44.5  | -34.5 | 46.5  |
| 9     | <i>Left postcentral gyrus</i>       | SM      | -38.5 | -22.5 | 56.5  | 34    | Supplementary motor area             | CC      | -6.5  | 13.5  | 64.5  |
| 10    | <i>Paracentral lobule</i>           | SM      | 0.5   | -22.5 | 65.5  | 35    | Superior frontal gyrus               | CC      | -24.5 | 26.5  | 49.5  |
| 11    | <i>Right postcentral gyrus</i>      | SM      | 38.5  | -19.5 | 55.5  | 36    | Middle frontal gyrus                 | CC      | 30.5  | 41.5  | 28.5  |
| 12    | <i>Superior parietal lobule</i>     | SM      | -18.5 | -43.5 | 65.5  | 37    | Hippocampus                          | CC      | 23.5  | -9.5  | -16.5 |
| 13    | <i>Paracentral lobule</i>           | SM      | -18.5 | -9.5  | 56.5  | 38    | <i>Left inferior parietal lobule</i> | CC      | 45.5  | -61.5 | 43.5  |
| 14    | <i>Precentral gyrus</i>             | SM      | -42.5 | -7.5  | 46.5  | 39    | Middle cingulate cortex              | CC      | -15.5 | 20.5  | 37.5  |
| 15    | <i>Superior parietal lobule</i>     | SM      | 20.5  | -63.5 | 58.5  | 40    | Inferior frontal gyrus               | CC      | 39.5  | 44.5  | -0.5  |
| 16    | <i>Postcentral gyrus</i>            | SM      | -47.5 | -27.5 | 43.5  | 41    | Middle frontal gyrus                 | CC      | -26.5 | 47.5  | 5.5   |
| 17    | <i>Calcarine gyrus</i>              | VI      | -12.5 | -66.5 | 8.5   | 42    | <i>Hippocampus</i>                   | CC      | -24.5 | -36.5 | 1.5   |
| 18    | <i>Middle occipital gyrus</i>       | VI      | -23.5 | -93.5 | -0.5  | 43    | Precuneus                            | DM      | -8.5  | -66.5 | 35.5  |
| 19    | Middle temporal gyrus               | VI      | 48.5  | -60.5 | 10.5  | 44    | <i>Precuneus</i>                     | DM      | -12.5 | -54.5 | 14.5  |
| 20    | <i>Cuneus</i>                       | VI      | 15.5  | -91.5 | 22.5  | 45    | <i>Anterior cingulate cortex</i>     | DM      | -2.5  | 35.5  | 2.5   |
| 21    | <i>Right middle occipital gyrus</i> | VI      | 38.5  | -73.5 | 6.5   | 46    | Posterior cingulate cortex           | DM      | -5.5  | -28.5 | 26.5  |
| 22    | <i>Fusiform gyrus</i>               | VI      | 29.5  | -42.5 | -12.5 | 47    | <i>Anterior cingulate cortex</i>     | DM      | -9.5  | 46.5  | -10.5 |
| 23    | <i>Inferior occipital gyrus</i>     | VI      | -36.5 | -76.5 | -4.5  | 48    | <i>Precuneus</i>                     | DM      | -0.5  | -48.5 | 49.5  |
| 24    | <i>Lingual gyrus</i>                | VI      | -8.5  | -81.5 | -4.5  | 49    | Posterior cingulate cortex           | DM      | -2.5  | 54.5  | 31.5  |
| 25    | <i>Middle temporal gyrus</i>        | VI      | -44.5 | -57.5 | -7.5  | 50    | <i>Cerebellum</i>                    | CB      | -30.5 | -54.5 | -42.5 |
|       |                                     |         |       |       |       | 51    | <i>Cerebellum</i>                    | CB      | -32.5 | -79.5 | -37.5 |
|       |                                     |         |       |       |       | 52    | <i>Cerebellum</i>                    | CB      | 20.5  | -48.5 | -40.5 |
|       |                                     |         |       |       |       | 53    | <i>Cerebellum</i>                    | CB      | 30.5  | -63.5 | -40.5 |

Table 3: Most significant biological processes for AD patients obtained from the analysis of the most relevant SNPs with positive IG attributions. In this Table are shown the biological processes, their raw  $p$ -value, and the overlap genes. \* indicates statistically significant biological processes after Bonferroni correction.

| Biological processes                                 | GO term    | p-value                             | Overlap genes                                                                                                                                                                                                                              |
|------------------------------------------------------|------------|-------------------------------------|--------------------------------------------------------------------------------------------------------------------------------------------------------------------------------------------------------------------------------------------|
| Intracellular transport*                             | GO:0046907 | 0.000044<br>( $p_{bonf} = 0.0225$ ) | BLOC1S3; KLC3; TOMM40; PICALM; MME; NUP88; TMEM106B; NSF; NUP43; BIN1; RAB12; APOE; SORL1; CLU                                                                                                                                             |
| Regulation of protein-containing complex assembly*   | GO:0043254 | 0.000080<br>( $p_{bonf} = 0.0413$ ) | PTK2B; MARK4; FNIP2; PLCG2; BIN1; APOE; SORL1; TREM2; CLU                                                                                                                                                                                  |
| Establishment of localization in cell*               | GO:0051649 | 0.000086<br>( $p_{bonf} = 0.0446$ ) | BLOC1S3; KLC3; TOMM40; PICALM; MME; NUP88; TMEM106B; NSF; NUP43; BIN1; RAB12; APOE; SORL1; NECTIN2; CLU                                                                                                                                    |
| Cell development*                                    | GO:0048468 | 0.000091<br>( $p_{bonf} = 0.0470$ ) | BLOC1S3; KLC3; PICALM; PTK2B; ALDH1A2; TNXB; TMEM106B; FCER1G; OOSP2; PLCG2; IGSF23; BIN1; ERCC2; RELB; APOE; ETV1; NECTIN2; TREM2; CLU                                                                                                    |
| Cell projection organization                         | GO:0030030 | 0.000253                            | BLOC1S3; KLC3; PICALM; PTK2B; TNXB; TMEM106B; MARK4; CDH13; APOE; ETV1; MTSS2; NECTIN2; TREM2                                                                                                                                              |
| Plasma membrane bounded cell projection organization | GO:0120036 | 0.000253                            | BLOC1S3; KLC3; PICALM; PTK2B; TNXB; TMEM106B; MARK4; CDH13; APOE; ETV1; MTSS2; NECTIN2; TREM2                                                                                                                                              |
| Membrane organization                                | GO:0061024 | 0.000253                            | TOMM40; PICALM; RABEP1; NSF; APOA2; BIN1; CR1; RAB12; APOE; MTSS2; NECTIN2; TREM2; CLU                                                                                                                                                     |
| Developmental maturation                             | GO:0021700 | 0.000417                            | BLOC1S3; PICALM; PTK2B; ALDH1A2; SLC24A4; OOSP2; ERCC2                                                                                                                                                                                     |
| Positive regulation of endocytosis                   | GO:0045807 | 0.000417                            | FCER1G; PLCG2; APOA2; BIN1; APOE; TREM2; CLU                                                                                                                                                                                               |
| Regulation of vesicle-mediated transport             | GO:0060627 | 0.000427                            | PICALM; NSF; FCER1G; PLCG2; APOA2; BIN1; RAB12; CDH13; APOE; SORL1; TREM2; CLU                                                                                                                                                             |
| Endomembrane system organization                     | GO:0010256 | 0.000500                            | BLOC1S3; NSF; USP8; BIN1; CR1; USP6NL; MTSS2; NECTIN2; CLU                                                                                                                                                                                 |
| Nitrogen compound transport                          | GO:0071705 | 0.000741                            | BLOC1S3; TOMM40; RABEP1; MME; NUP88; NSF; NUP43; CR1; RAB12; APOE; SORL1; CLU                                                                                                                                                              |
| Organelle localization                               | GO:0051640 | 0.000771                            | BLOC1S3; PICALM; NUP88; TMEM106B; CLU; BIN1; RAB12; NECTIN2                                                                                                                                                                                |
| Cellular component organization or biogenesis        | GO:0071840 | 0.000792                            | BLOC1S3; KLC3; TOMM40; PICALM; RABEP1; MME; NUP88; PTK2B; ALDH1A2; PHB1; TNXB; TMEM106B; NSF; MARK4; KCTD1; CCDC6; CLU; MINDY2; LTBP4; APOA2; USP8; BIN1; CR1; ERCC2; USP6NL; RAB12; GEMIN7; CDH13; APOE; ETV1; MTSS2; NECTIN2; TREM2; CLU |
| Localization                                         | GO:0051179 | 0.000950                            | BLOC1S3; KLC3; TOMM40; PICALM; RABEP1; MME; NUP88; TMEM106B; NSF; FCER1G; SLC24A4; CLU; PLCG2; LTBP4; APOA2; NUP43; BIN1; CR1; USP6NL; RAB12; NBEAL1; CDH13; APOE; SORL1; NECTIN2; TREM2; CLU                                              |

Table 4: Most significant biological processes for MCIc patients obtained from the analysis of the most relevant SNPs with positive IG attributions. In this Table are shown the biological processes, their raw  $p$ -value, and the overlap genes.

| Biological processes                                               | GO term    | p-value | Overlap genes                                               |
|--------------------------------------------------------------------|------------|---------|-------------------------------------------------------------|
| Positive regulation of amide metabolic process                     | GO:0034250 | 0.00109 | PICALM; RPS27L; PTK2B; APOE; CLU                            |
| Protein-lipid complex assembly                                     | GO:0065005 | 0.00109 | APOC1; ABCA7; APOA2; BIN1; APOE                             |
| Regulation of amide metabolic process                              | GO:0034248 | 0.00128 | PICALM; RPS27L; PTK2B; ABCA7; BIN1; APOE; CELF1; CLU        |
| Positive regulation of endocytosis                                 | GO:0045807 | 0.00147 | FCER1G; ABCA7; PLCG2; APOA2; BIN1; APOE; CLU                |
| Plasma lipoprotein particle assembly                               | GO:0034377 | 0.00436 | APOC1; ABCA7; APOA2; APOE                                   |
| Regulation of endocytosis                                          | GO:0030100 | 0.00453 | PICALM; APOC1; FCER1G; ABCA7; PLCG2; APOA2; BIN1; APOE; CLU |
| Sterol transport                                                   | GO:0015918 | 0.00519 | APOC1; ABCA7; APOA2; APOE; CLU                              |
| Organic hydroxy compound transport                                 | GO:0015850 | 0.00519 | APOC1; ABCA7; APOA2; APOE; CLU                              |
| Cholesterol transport                                              | GO:0030301 | 0.00519 | APOC1; ABCA7; APOA2; APOE; CLU                              |
| Protein-lipid complex organization                                 | GO:0071825 | 0.00519 | APOC1; ABCA7; APOA2; BIN1; APOE                             |
| Regulation of lipid metabolic process                              | GO:0019216 | 0.00841 | LACTB; APOC1; ABCA7; PLCG2; APOA2; EPHX2; APOE              |
| Negative regulation of amide metabolic process                     | GO:0034249 | 0.01440 | ABCA7; BIN1; APOE; CELF1; CLU                               |
| Negative regulation of amyloid precursor protein catabolic process | GO:1902992 | 0.01440 | PICALM; ABCA7; BIN1; APOE; CLU                              |
| Monoatomic cation homeostasis                                      | GO:0055080 | 0.01440 | PICALM; TMEM106B; SLC24A4; TSPOAP1; APOE                    |
| Intracellular monoatomic cation homeostasis                        | GO:0030003 | 0.01440 | PICALM; TMEM106B; SLC24A4; TSPOAP1; APOE                    |

Table 5: Most significant biological processes for MCInc patients obtained from the analysis of the most relevant SNPs with positive IG attributions. In this Table are shown the biological processes, their raw  $p$ -value, and the overlap genes.

| Biological processes                                                                                                      | GO term    | p-value | Overlap genes                              |
|---------------------------------------------------------------------------------------------------------------------------|------------|---------|--------------------------------------------|
| T cell activation                                                                                                         | GO:0042110 | 0.00695 | FCER1G; TREML2; SPI1; RELB                 |
| Lymphocyte activation involved in immune response                                                                         | GO:0002285 | 0.00695 | FCER1G; PLCG2; ERCC1; RELB                 |
| Negative regulation of hydrolase activity                                                                                 | GO:0051346 | 0.00695 | PICALM; APOA2; BIN1; CR1                   |
| T cell differentiation                                                                                                    | GO:0030217 | 0.00836 | FCER1G; SPI1; RELB                         |
| Negative regulation of peptidase activity                                                                                 | GO:0010466 | 0.00836 | PICALM; BIN1; CR1                          |
| Negative regulation of endopeptidase activity                                                                             | GO:0010951 | 0.00836 | PICALM; BIN1; CR1                          |
| Adaptive immune response based on somatic recombination of immune receptors built from immunoglobulin superfamily domains | GO:0002460 | 0.01170 | FCER1G; CR1L; HLA-DRB1; ERCC1; CR1; RELB   |
| Immune effector process                                                                                                   | GO:0002252 | 0.01800 | FCER1G; CR1L; PLCG2; ACE; ERCC1; CR1; RELB |
| Leukocyte mediated immunity                                                                                               | GO:0002443 | 0.02020 | FCER1G; CR1L; ACE; ERCC1; CR1              |
| Male gonad development                                                                                                    | GO:0008584 | 0.02850 | ACE; ERCC1; PLEKHA1                        |
| Male sex differentiation                                                                                                  | GO:0046661 | 0.02850 | ACE; ERCC1; PLEKHA1                        |
| Development of primary male sexual characteristics                                                                        | GO:0046546 | 0.02850 | ACE; ERCC1; PLEKHA1                        |
| Antigen processing and presentation of peptide antigen                                                                    | GO:0048002 | 0.02850 | FCER1G; ACE; HLA-DRB1                      |
| Lymphocyte activation                                                                                                     | GO:0046649 | 0.03080 | FCER1G; TREML2; PLCG2; ERCC1; SPI1; RELB   |
| Positive regulation of lymphocyte activation                                                                              | GO:0051251 | 0.03400 | BLOC1S3; HLA-DRB1; SMARCD3; CR1; SPI1      |

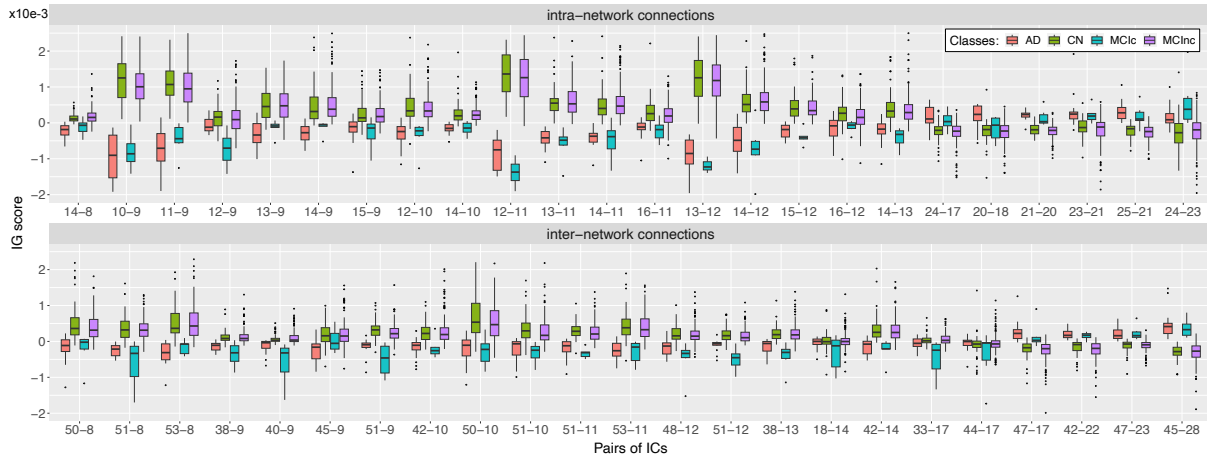

Figure 1: Boxplots that show the distributions of the subjects CN, AD, MCInc, and MCIc in the most important connections based on the fMRI IG score.
